# Supplementary material for: Circulating miRNAs as non-invasive biomarkers to predict aggressive prostate cancer after radical prostatectomy
Source: Springer Nature journal article supplement (doi:10.1186/s12967-019-1920-5), 2019-05-23
Supplement: MOESM1 [file 16745514]

| P #   | PSA at diagnosis | PSA Post-RP | GS Primary | GS Secondary | Gleason | T Stage | Margin | Stratification | Notes |
|-------|------------------|-------------|------------|--------------|---------|---------|--------|----------------|-------|
| P5004 |                  | 0.17        | 4          | 4            | 8       | T3b     | -      | High Risk      |       |
| P5006 | 4                | 0.36        | 3          | 4            | 7       | T3a     | -      | Low Risk       |       |
| P5007 | 10               | 0.26        | 4          | 3            | 7       | T3a     | -      | Low Risk       |       |
| P5008 | 10               | 0.12        | 4          | 3            | 7       | T2c     | -      | Low Risk       |       |
| P5010 | 18               | 0.04        | 3          | 4            | 7       | T3b     | -      | High Risk      |       |
| P5011 | 5                | 0.03        | 4          | 4            | 8       | T3a     | +      | High Risk      |       |
| P5013 | 6                | 0.02        | 4          | 3            | 7       | T3a     | +      | High Risk      |       |
| P5014 | 17               | 0.48        | 4          | 5            | 9       | T3a     | +      | High Risk      |       |
| P5015 | 140              | 0.03        | 3          | 4            | 7       | T3a     | +      | High Risk      |       |
| P5018 | 17               | 0.20        | 4          | 3            | 7       | T3a     | +      | High Risk      |       |
| P5019 | 17               | 0.01        | 4          | 3            | 7       | T2c     | +      | Low Risk       |       |
| P5021 | 9                | 0.35        | 3          | 4            | 7       | T3a     | +      | High Risk      |       |
| P5022 | 19               | 2.28        | 4          | 5            | 9       | T3b     | -      | High Risk      |       |
| P5026 | 6                | 0.13        | 3          | 4            | 7       | T2c     | +      | Low Risk       |       |
| P5027 | 9                | 0.01        | 4          | 3            | 7       | T3b     | -      | High Risk      |       |
| P5028 | 7                | 0.02        | 4          | 5            | 9       | T3a     | -      | High Risk      |       |
| P5029 | 7                | 0.00        | 4          | 5            | 9       | T3a     | -      | High Risk      |       |
| P5030 | 7                | 0.04        | 4          | 3            | 7       | T2c     | +      | Low Risk       |       |
| P5031 | 22               | 0.10        | 4          | 5            | 9       | T3b     | +      | High Risk      |       |
| P5034 | 10               | 0.59        | 3          | 4            | 7       | T3a     | -      | Low Risk       |       |
| P5035 | 20               | 0.99        | 4          | 5            | 9       | T3b     | +      | High Risk      |       |
| P5036 | 5                | 0.11        | 5          | 3            | 8       | T3a     | -      | High Risk      |       |
| P5037 | 11               | 0.10        | 4          | 3            | 7       | T3b     | +      | High Risk      |       |
| P5039 | 5                | 0.24        | 3          | 4            | 7       | T3b     | +      | High Risk      |       |
| P5048 | 5                | 0.16        | 4          | 4            | 8       | T3a     | +      | High Risk      |       |
| P5049 | 67               | 16.59       | 5          | 4            | 9       | T3b     | +      | High Risk      |       |
| P5051 |                  | 0.02        | 3          | 4            | 7       | T2c     | -      | Low Risk       |       |
| P5054 | 5                | 0.10        | 4          | 4            | 8       | T3a     | -      | High Risk      |       |
| P5056 | 7                | 0.00        | 3          | 3            | 6       | T3a     | -      | Low Risk       |       |
| P5057 | 10               | 0.48        | 4          | 5            | 9       | T3b     | +      | High Risk      |       |
| P5060 | 4                | 0.02        | 3          | 4            | 7       | T2      | -      | Low Risk       |       |
| P5063 | 12               | 0.02        | 4          | 5            | 9       | T3b     | -      | High Risk      |       |
| P5064 | 16               | 0.00        | 4          | 3            | 7       | T3a     | +      | High Risk      |       |

|       |    |      |   |   |   |     |   |           |   |
|-------|----|------|---|---|---|-----|---|-----------|---|
| P5066 | 13 | 0.00 | 4 | 3 | 7 | T3b | + | High Risk |   |
| P5067 | 10 | 0.09 | 4 | 3 | 7 | T2c | + | Low Risk  |   |
| P5068 | 7  | 0.00 | 3 | 4 | 7 | T2c | - | Low Risk  |   |
| P5069 | 5  | 0.00 | 4 | 3 | 7 | T3a | + | High Risk |   |
| P5072 |    | 0.06 | 4 | 3 | 7 | T3b | + |           | * |
| P5073 | 5  | 0.88 | 3 | 3 | 6 | T2  | - | Low Risk  |   |
| P5077 | 14 | 2.94 | 4 | 5 | 9 | T3b | - | High Risk |   |
| P5078 | 20 | 0.00 | 4 | 5 | 9 | T3b | + | High Risk |   |
| P5080 | 7  | 0.27 | 3 | 4 | 7 | T2  | + | Low Risk  |   |
| P5090 | 11 | 0.00 | 3 | 4 | 7 | T3b | - | High Risk |   |
| P5095 |    | 0.00 | 3 | 4 | 7 | T3a | - |           | * |
| P5097 | 14 | 0.31 | 5 | 4 | 9 | T3b | + | High Risk |   |
| P5098 | 13 | 0.44 | 4 | 3 | 7 | T4  | + | High Risk |   |
| P5099 | 10 | 0.10 | 3 | 4 | 7 | T3b | - | High Risk |   |
| P5101 |    | 0.38 | 3 | 3 | 6 | T2c | + | Low Risk  |   |
| P5102 | 6  | 0.00 | 4 | 5 | 9 | T2c | + | High Risk |   |
| P5103 | 16 | 0.18 | 4 | 3 | 7 | T3a | + | High Risk |   |
| P5104 | 7  | 0.00 | 3 | 4 | 7 | T2c | - | Low Risk  |   |
| P5105 | 12 | 0.31 | 4 | 4 | 8 | T2a | - | High Risk |   |
| P5106 | 4  | 0.00 | 3 | 4 | 7 | T2c | - | Low Risk  |   |
| P5108 | 9  | 3.80 | 4 | 5 | 9 | T3a | + | High Risk |   |
| P5110 |    | 0.00 | 3 | 4 | 7 | T2  | - | Low Risk  |   |
| P5112 | 5  | 0.03 | 4 | 4 | 8 | T3a | + | High Risk |   |
| P5113 | 9  | 0.52 | 3 | 4 | 7 | T2a | - | Low Risk  |   |
| P5115 | 6  | 0.04 | 4 | 5 | 9 | T3a | + | High Risk |   |
| P5116 | 8  | 0.00 | 3 | 4 | 7 | T2c | + | Low Risk  |   |
| P5117 |    | 0.99 | 3 | 4 | 7 | T2  | - | Low Risk  |   |
| P5118 | 6  | 0.00 | 4 | 3 | 7 | T2c | + | Low Risk  |   |
| P5119 | 4  | 0.44 | 4 | 3 | 7 | T2  | - | Low Risk  |   |
| P5120 | 2  | 0.03 | 4 | 4 | 8 | T3a | + | High Risk |   |
| P5121 | 5  | 0.26 | 3 | 4 | 7 | T2  | + | Low Risk  |   |
| P5122 | 10 | 0.08 | 4 | 3 | 7 | T3a | - | Low Risk  |   |
| P5123 |    | 0.18 | 4 | 3 | 7 | T2c | + |           | * |
| P5125 | 6  | 0.27 | 4 | 3 | 7 | T3a | - | Low Risk  |   |

|              |    |      |   |   |   |     |   |           |  |
|--------------|----|------|---|---|---|-----|---|-----------|--|
| <b>P5126</b> | 6  | 0.06 | 3 | 4 | 7 | T3a | + | High Risk |  |
| <b>P5127</b> | 9  | 5.08 | 3 | 5 | 8 | T2  | - | High Risk |  |
| <b>P5128</b> | 12 | 0.14 | 3 | 4 | 7 | T3a | + | High Risk |  |
| <b>P5129</b> |    | 1.72 | 3 | 4 | 7 | T2  | + | Low Risk  |  |
| <b>P5130</b> | 5  | 0.00 | 4 | 5 | 9 | T3b | + | High Risk |  |
| <b>P5131</b> | 11 | 0.66 | 4 | 3 | 7 | T3a | + | High Risk |  |
| <b>P5132</b> | 5  | 0.14 | 3 | 4 | 7 | T2  | + | Low Risk  |  |
| <b>P5133</b> | 4  | 0.15 | 4 | 3 | 7 | T3a | - | Low Risk  |  |
| <b>P5135</b> | 10 | 0.00 | 3 | 4 | 7 | T3a | + | High Risk |  |
| <b>P5137</b> | 6  | 0.11 | 3 | 4 | 7 | T2  | - | Low Risk  |  |
| <b>P5139</b> | 4  | 0.15 | 3 | 4 | 7 | T3a | - | Low Risk  |  |

|                  |    |
|------------------|----|
| <b>High risk</b> | 44 |
| <b>Low risk</b>  | 31 |

75

\* denotes insufficient RNA quality/quantity and sample excluded
