# Supplementary material for: Circulating miRNAs as non-invasive biomarkers to predict aggressive prostate cancer after radical prostatectomy
Source: Springer Nature journal article supplement (doi:10.1186/s12967-019-1920-5), 2019-05-23
Supplement: MOESM2 [file 16745514]

### miRNA mimic sequences

|                 |                                                          |
|-----------------|----------------------------------------------------------|
| <b>Control</b>  | F: UUCUCCGAACGUGUCACGUTT<br>R: ACGUGACACGUUCGGAGAATT     |
| <b>miR-17</b>   | F: CAAAGUGCUUACAGUGCAGGUAG<br>R: ACCUGCACUGUAAGCACUUUGUU |
| <b>miR-20a</b>  | F: UAAAGUGCUUAUAGUGCAGGUAG<br>R: ACCUGCACUAUAAGCACUUUAUU |
| <b>miR-20b</b>  | F:CAAAGUGCUCAUAGUGCAGGUAG<br>R:ACCUGCACUAUGAGCACUUUGUU   |
| <b>miR-106a</b> | F: AAAAGUGCUUACAGUGCAGGUAG<br>R: ACCUGCACUGUAAGCACUUUUUU |
