# Supplementary material for: Circulating miRNAs as non-invasive biomarkers to predict aggressive prostate cancer after radical prostatectomy
Source: Springer Nature journal article supplement (doi:10.1186/s12967-019-1920-5), 2019-05-23

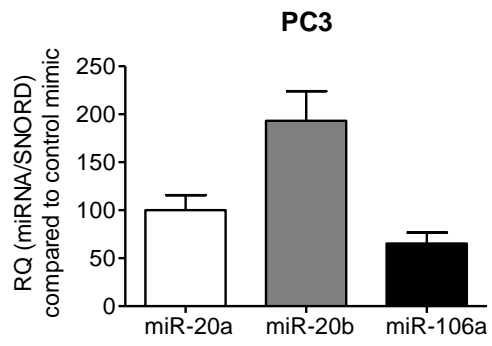

Supplement: MOESM3 [file 16745514]
