# Supplementary material for: Circulating miRNAs as non-invasive biomarkers to predict aggressive prostate cancer after radical prostatectomy
Source: Springer Nature journal article supplement (doi:10.1186/s12967-019-1920-5), 2019-05-23
Supplement: MOESM4 [file 16745514]

| id                | baseMean    | baseMeanA   | baseMeanB   | foldChange  | log2FoldChange | pval | padj     | minuslog2pval |
|-------------------|-------------|-------------|-------------|-------------|----------------|------|----------|---------------|
| hsa-miR-1257      | 21.125      | 18.87096774 | 22.82926829 | 1.209756098 | 0.274716211    | 0.73 | 0.919104 | 0.454031631   |
| hsa-miR-656-3p    | 16.95833333 | 14.83870968 | 18.56097561 | 1.250848356 | 0.322906898    | 0.72 | 0.919104 | 0.473931188   |
| hsa-miR-574-5p    | 104.9444444 | 77.35483871 | 125.804878  | 1.626334954 | 0.70162442     | 0.27 | 0.528701 | 1.888968688   |
| hsa-miR-503-5p    | 11.875      | 11.87096774 | 11.87804878 | 1.000596501 | 0.000860312    | 1    | 1        | 0             |
| hsa-miR-188-5p    | 26.05555556 | 19.35483871 | 31.12195122 | 1.60796748  | 0.685238229    | 0.3  | 0.569907 | 1.736965594   |
| hsa-miR-138-5p    | 10.22222222 | 10.96774194 | 9.658536585 | 0.880631277 | -0.18339001    | 0.82 | 0.955801 | 0.286304185   |
| hsa-miR-212-3p    | 17.05555556 | 17.09677419 | 17.02439024 | 0.995766222 | -0.006121017   | 0.97 | 0.996418 | 0.043943348   |
| hsa-miR-2053      | 11.43055556 | 12.5483871  | 10.58536585 | 0.84356386  | -0.245430807   | 0.79 | 0.954618 | 0.340075442   |
| hsa-miR-28-5p     | 50.93055556 | 40.70967742 | 58.65853659 | 1.440899076 | 0.526969289    | 0.33 | 0.591941 | 1.59946207    |
| hsa-miR-1972      | 53.22222222 | 48.80645161 | 56.56097561 | 1.158883175 | 0.212735138    | 0.7  | 0.919104 | 0.514573173   |
| hsa-miR-379-5p    | 20.97222222 | 18.4516129  | 22.87804878 | 1.239894252 | 0.310217082    | 0.68 | 0.919104 | 0.556393349   |
| hsa-miR-30c-5p    | 8.916666667 | 7.741935484 | 9.804878049 | 1.266463415 | 0.340805401    | 0.67 | 0.919104 | 0.577766999   |
| hsa-miR-96-5p     | 12.125      | 12.09677419 | 12.14634146 | 1.004097561 | 0.005899452    | 1    | 1        | 0             |
| hsa-miR-1307-3p   | 14.95833333 | 12.96774194 | 16.46341463 | 1.2695668   | 0.344336307    | 0.64 | 0.901814 | 0.64385619    |
| hsa-miR-423-3p    | 23.61111111 | 17.25806452 | 28.41463415 | 1.646455437 | 0.719363464    | 0.24 | 0.515541 | 2.058893689   |
| hsa-miR-593-3p    | 10.52777778 | 9.161290323 | 11.56097561 | 1.261937479 | 0.335640435    | 0.69 | 0.919104 | 0.535331733   |
| hsa-miR-584-5p    | 7.222222222 | 8.806451613 | 6.024390244 | 0.684088269 | -0.547745604   | 0.48 | 0.760035 | 1.058893689   |
| hsa-miR-127-3p    | 22.66666667 | 23.80645161 | 21.80487805 | 0.915923062 | -0.126701679   | 0.82 | 0.955801 | 0.286304185   |
| hsa-miR-575       | 16.70833333 | 15.90322581 | 17.31707317 | 1.088903181 | 0.122875684    | 0.92 | 0.980533 | 0.120294234   |
| hsa-miR-125b-5p   | 91.20833333 | 58.58064516 | 115.8780488 | 1.978094445 | 0.98411131     | 0.05 | 0.366548 | 4.321928095   |
| hsa-miR-216b-5p   | 13.45833333 | 13.5483871  | 13.3902439  | 0.988327526 | -0.016938873   | 0.96 | 0.996399 | 0.058893689   |
| hsa-miR-191-5p    | 1269.819444 | 893.0322581 | 1554.707317 | 1.740930748 | 0.799858816    | 0.09 | 0.370329 | 3.473931188   |
| hsa-miR-29a-3p    | 77.25       | 49.22580645 | 98.43902439 | 1.99974427  | 0.999815518    | 0.05 | 0.366548 | 4.321928095   |
| hsa-miR-181b-2-3p | 14.16666667 | 14.58064516 | 13.85365854 | 0.950140298 | -0.073787537   | 0.91 | 0.980533 | 0.13606155    |
| hsa-miR-140-3p    | 15.44444444 | 13.25806452 | 17.09756098 | 1.289597057 | 0.366920356    | 0.7  | 0.919104 | 0.514573173   |
| hsa-miR-149-5p    | 91.19444444 | 66.51612903 | 109.8536585 | 1.651534149 | 0.7238068      | 0.24 | 0.515541 | 2.058893689   |
| hsa-miR-340-5p    | 28.11111111 | 21.58064516 | 33.04878049 | 1.531408363 | 0.614859041    | 0.29 | 0.558245 | 1.785875195   |
| hsa-miR-548i      | 9.430555556 | 8.451612903 | 10.17073171 | 1.203407187 | 0.267124878    | 0.81 | 0.954739 | 0.304006187   |
| hsa-miR-548ah-5p  | 47.625      | 35.58064516 | 56.73170732 | 1.594454149 | 0.673062612    | 0.24 | 0.515541 | 2.058893689   |
| hsa-miR-374a-5p   | 62.91666667 | 42.16129032 | 78.6097561  | 1.864500718 | 0.898789353    | 0.09 | 0.370329 | 3.473931188   |
| hsa-miR-651-5p    | 18.52777778 | 17.35483871 | 19.41463415 | 1.118687098 | 0.161806564    | 0.87 | 0.961391 | 0.200912694   |
| hsa-miR-200c-3p   | 10.55555556 | 10.29032258 | 10.75609756 | 1.045263399 | 0.063866538    | 0.96 | 0.996399 | 0.058893689   |
| hsa-miR-192-5p    | 30.33333333 | 21          | 37.3902439  | 1.780487805 | 0.832272554    | 0.29 | 0.554246 | 1.785875195   |

|                 |             |             |             |             |              |      |          |             |
|-----------------|-------------|-------------|-------------|-------------|--------------|------|----------|-------------|
| hsa-miR-3144-3p | 41.90277778 | 31.5483871  | 49.73170732 | 1.576362911 | 0.656599711  | 0.39 | 0.646249 | 1.358453971 |
| hsa-miR-6724-5p | 13.55555556 | 13.64516129 | 13.48780488 | 0.98846797  | -0.016733877 | 0.96 | 0.996399 | 0.058893689 |
| hsa-miR-549a    | 12.52777778 | 11.87096774 | 13.02439024 | 1.097163309 | 0.133778281  | 0.91 | 0.980533 | 0.13606155  |
| hsa-miR-1236-3p | 15.63888889 | 14.87096774 | 16.2195122  | 1.090683033 | 0.125231896  | 0.91 | 0.980533 | 0.13606155  |
| hsa-miR-139-3p  | 16.09722222 | 14.25806452 | 17.48780488 | 1.226520252 | 0.294571055  | 0.73 | 0.919104 | 0.454031631 |
| hsa-let-7i-5p   | 415.5277778 | 283.1935484 | 515.5853659 | 1.82061127  | 0.864422917  | 0.07 | 0.368445 | 3.836501268 |
| hsa-miR-644a    | 16.02777778 | 14.06451613 | 17.51219512 | 1.245133139 | 0.316300015  | 0.73 | 0.919104 | 0.454031631 |
| hsa-let-7b-5p   | 1443.222222 | 965.9677419 | 1804.073171 | 1.867632937 | 0.901210937  | 0.06 | 0.366548 | 4.058893689 |
| hsa-miR-141-3p  | 10.31944444 | 11.51612903 | 9.414634146 | 0.817517251 | -0.290678921 | 0.75 | 0.935622 | 0.415037499 |
| hsa-miR-873-3p  | 57.58333333 | 52.32258065 | 61.56097561 | 1.176566118 | 0.234582397  | 0.8  | 0.954618 | 0.321928095 |
| hsa-miR-155-5p  | 65.94444444 | 42.19354839 | 83.90243902 | 1.988513463 | 0.99169033   | 0.06 | 0.366548 | 4.058893689 |
| hsa-miR-941     | 9.236111111 | 9.774193548 | 8.829268293 | 0.903324479 | -0.146683791 | 0.83 | 0.956438 | 0.268816758 |
| hsa-miR-891b    | 21.22222222 | 22.35483871 | 20.36585366 | 0.911026643 | -0.134434849 | 0.84 | 0.960795 | 0.251538767 |
| hsa-miR-142-3p  | 464.3611111 | 325.2580645 | 569.5365854 | 1.751029867 | 0.808203692  | 0.09 | 0.370329 | 3.473931188 |
| hsa-let-7c-5p   | 100.3472222 | 70.16129032 | 123.1707317 | 1.755536866 | 0.811912293  | 0.11 | 0.370329 | 3.184424571 |
| hsa-miR-217     | 11.25       | 12.70967742 | 10.14634146 | 0.798316207 | -0.324967796 | 0.71 | 0.919104 | 0.49410907  |
| hsa-miR-450a-5p | 27.52777778 | 19.09677419 | 33.90243902 | 1.775296638 | 0.828060108  | 0.16 | 0.425878 | 2.64385619  |
| hsa-miR-30b-5p  | 14.83333333 | 12.87096774 | 16.31707317 | 1.267742527 | 0.34226177   | 0.63 | 0.896521 | 0.666576266 |
| hsa-miR-592     | 13.97222222 | 15.96774194 | 12.46341463 | 0.780537078 | -0.357460928 | 0.71 | 0.919104 | 0.49410907  |
| hsa-miR-1287-5p | 13.97222222 | 13.29032258 | 14.48780488 | 1.090101823 | 0.124462899  | 0.92 | 0.980533 | 0.120294234 |
| hsa-miR-590-5p  | 19.51388889 | 21.06451613 | 18.34146341 | 0.870727972 | -0.199706024 | 0.77 | 0.947173 | 0.377069649 |
| hsa-miR-1226-3p | 12.09722222 | 13.48387097 | 11.04878049 | 0.819407165 | -0.287347586 | 0.76 | 0.940738 | 0.395928676 |
| hsa-miR-34c-3p  | 9.736111111 | 9.548387097 | 9.87804878  | 1.034525379 | 0.048969038  | 0.99 | 1        | 0.01449957  |
| hsa-miR-424-5p  | 18.375      | 18.90322581 | 17.97560976 | 0.950928161 | -0.07259174  | 0.9  | 0.980533 | 0.152003093 |
| hsa-miR-520a-5p | 14.81944444 | 12.12903226 | 16.85365854 | 1.389530358 | 0.474597354  | 0.63 | 0.896521 | 0.666576266 |
| hsa-miR-640     | 17.86111111 | 17.48387097 | 18.14634146 | 1.037890379 | 0.053654076  | 0.97 | 0.996418 | 0.043943348 |
| hsa-miR-877-5p  | 20.51388889 | 14.58064516 | 25          | 1.71460177  | 0.777873538  | 0.32 | 0.591941 | 1.64385619  |
| hsa-miR-515-3p  | 12.59722222 | 13.25806452 | 12.09756098 | 0.912468103 | -0.132153968 | 0.87 | 0.961391 | 0.200912694 |
| hsa-miR-302c-3p | 13.02777778 | 11.67741935 | 14.04878049 | 1.203072362 | 0.26672342   | 0.8  | 0.954618 | 0.321928095 |
| hsa-miR-21-5p   | 307.2916667 | 194.3548387 | 392.6829268 | 2.020443275 | 1.014671848  | 0.04 | 0.366548 | 4.64385619  |
| hsa-miR-4531    | 16.84722222 | 14.70967742 | 18.46341463 | 1.255188276 | 0.327903782  | 0.64 | 0.901814 | 0.64385619  |
| hsa-miR-665     | 12.55555556 | 15.83870968 | 10.07317073 | 0.635984303 | -0.652936937 | 0.5  | 0.773139 | 1           |
| hsa-miR-4443    | 31.63888889 | 30.12903226 | 32.7804878  | 1.088003343 | 0.121682989  | 0.89 | 0.980533 | 0.168122759 |
| hsa-miR-628-3p  | 8.25        | 8.032258065 | 8.414634146 | 1.047605054 | 0.067094925  | 0.95 | 0.996399 | 0.074000581 |

|                           |             |             |             |             |              |      |          |             |
|---------------------------|-------------|-------------|-------------|-------------|--------------|------|----------|-------------|
| hsa-miR-548a1             | 14.29166667 | 12.87096774 | 15.36585366 | 1.193838254 | 0.255607388  | 0.8  | 0.954618 | 0.321928095 |
| hsa-let-7a-5p             | 1612.291667 | 1291.516129 | 1854.829268 | 1.436164231 | 0.522220736  | 0.27 | 0.528701 | 1.888968688 |
| hsa-miR-1246              | 203.7083333 | 296         | 133.9268293 | 0.452455504 | -1.144152174 | 0.3  | 0.558245 | 1.736965594 |
| hsa-miR-1827              | 6.402777778 | 7.064516129 | 5.902439024 | 0.835505067 | -0.259279517 | 0.74 | 0.926468 | 0.434402824 |
| hsa-miR-423-5p            | 405.625     | 276.0322581 | 503.6097561 | 1.824459792 | 0.867469357  | 0.07 | 0.368445 | 3.836501268 |
| hsa-miR-4536-5p           | 18.15277778 | 16.77419355 | 19.19512195 | 1.144324578 | 0.194496318  | 0.79 | 0.954618 | 0.340075442 |
| hsa-miR-2682-5p           | 64.79166667 | 46.80645161 | 78.3902439  | 1.674774336 | 0.743966715  | 0.2  | 0.479635 | 2.321928095 |
| hsa-miR-4787-5p           | 16.04166667 | 14.87096774 | 16.92682927 | 1.138246654 | 0.186813218  | 0.84 | 0.960795 | 0.251538767 |
| hsa-miR-1268a             | 10.55555556 | 9.064516129 | 11.68292683 | 1.288863814 | 0.366099831  | 0.66 | 0.913145 | 0.59946207  |
| hsa-miR-19a-3p            | 66.83333333 | 37.5483871  | 88.97560976 | 2.369625346 | 1.244658977  | 0.03 | 0.366548 | 5.058893689 |
| hsa-miR-122-5p            | 2463.888889 | 1632.774194 | 3092.292683 | 1.893888754 | 0.92135159   | 0.05 | 0.366548 | 4.321928095 |
| hsa-miR-382-5p            | 45.23611111 | 42.38709677 | 47.3902439  | 1.118034673 | 0.160964931  | 0.78 | 0.947173 | 0.358453971 |
| hsa-miR-577               | 15.29166667 | 12.25806452 | 17.58536585 | 1.434595635 | 0.520644147  | 0.57 | 0.851726 | 0.810966176 |
| hsa-miR-140-5p            | 56.15277778 | 37.5483871  | 70.2195122  | 1.870107284 | 0.903121036  | 0.09 | 0.370329 | 3.473931188 |
| hsa-miR-6721-5p           | 26.84722222 | 24.29032258 | 28.7804878  | 1.18485408  | 0.244709395  | 0.85 | 0.961391 | 0.234465254 |
| hsa-miR-148a-3p           | 286.2777778 | 207.3225806 | 345.9756098 | 1.668779198 | 0.738793079  | 0.13 | 0.391186 | 2.943416472 |
| hsa-miR-216a-5p           | 9.805555556 | 8.580645161 | 10.73170732 | 1.250687695 | 0.322721584  | 0.72 | 0.919104 | 0.473931188 |
| hsa-miR-302f              | 10.04166667 | 11.22580645 | 9.146341463 | 0.814760303 | -0.295552405 | 0.72 | 0.919104 | 0.473931188 |
| hsa-miR-324-5p            | 37.69444444 | 20.4516129  | 50.73170732 | 2.48057244  | 1.310673089  | 0.02 | 0.366548 | 5.64385619  |
| hsa-miR-518b              | 8.055555556 | 6.290322581 | 9.390243902 | 1.492808005 | 0.578028628  | 0.48 | 0.760035 | 1.058893689 |
| hsa-miR-520f-3p           | 38.38888889 | 26.61290323 | 47.29268293 | 1.777058389 | 0.829491085  | 0.35 | 0.601768 | 1.514573173 |
| hsa-miR-151a-3p           | 46.08333333 | 27.19354839 | 60.36585366 | 2.219859387 | 1.150468295  | 0.04 | 0.366548 | 4.64385619  |
| hsa-miR-15a-5p            | 139.875     | 92.29032258 | 175.8536585 | 1.905439851 | 0.930124068  | 0.06 | 0.366548 | 4.058893689 |
| hsa-miR-4454+hsa-miR-7975 | 2244.930556 | 1964.548387 | 2456.926829 | 1.250631873 | 0.322657191  | 0.5  | 0.773139 | 1           |
| hsa-miR-1180-3p           | 15.72222222 | 9.451612903 | 20.46341463 | 2.165071173 | 1.114414452  | 0.1  | 0.370329 | 3.321928095 |
| hsa-miR-128-1-5p          | 18.26388889 | 10.80645161 | 23.90243902 | 2.211867492 | 1.145264959  | 0.25 | 0.515541 | 2           |
| hsa-miR-374b-5p           | 14.70833333 | 9.64516129  | 18.53658537 | 1.921853332 | 0.94249824   | 0.16 | 0.425878 | 2.64385619  |
| hsa-miR-92a-3p            | 99.33333333 | 62.32258065 | 127.3170732 | 2.042872292 | 1.030599018  | 0.04 | 0.366548 | 4.64385619  |
| hsa-miR-98-5p             | 61.34722222 | 49.19354839 | 70.53658537 | 1.433858457 | 0.519902615  | 0.32 | 0.591941 | 1.64385619  |
| hsa-miR-24-3p             | 177.875     | 117.5483871 | 223.4878049 | 1.901240931 | 0.926941366  | 0.06 | 0.366548 | 4.058893689 |
| hsa-miR-505-3p            | 6.958333333 | 3.903225806 | 9.268292683 | 2.374521266 | 1.247636677  | 0.15 | 0.414946 | 2.736965594 |
| hsa-miR-150-5p            | 885.8888889 | 658.7419355 | 1057.634146 | 1.605536386 | 0.683055361  | 0.15 | 0.418199 | 2.736965594 |
| hsa-miR-19b-3p            | 244.0833333 | 138.0967742 | 324.2195122 | 2.347770352 | 1.231291298  | 0.02 | 0.366548 | 5.64385619  |

|                                                     |             |             |             |             |              |      |          |             |
|-----------------------------------------------------|-------------|-------------|-------------|-------------|--------------|------|----------|-------------|
| <b>hsa-miR-193a-5p+hsa-miR-193b-5p</b>              | 14.56944444 | 11.06451613 | 17.2195122  | 1.556282443 | 0.638103913  | 0.35 | 0.601768 | 1.514573173 |
| <b>hsa-miR-548n</b>                                 | 8.708333333 | 3.870967742 | 12.36585366 | 3.194512195 | 1.675595647  | 0.05 | 0.366548 | 4.321928095 |
| <b>hsa-miR-29b-3p</b>                               | 13.06944444 | 10.03225806 | 15.36585366 | 1.531644577 | 0.615081554  | 0.38 | 0.639909 | 1.395928676 |
| <b>hsa-miR-93-5p</b>                                | 1065.444444 | 678.3225806 | 1358.146341 | 2.002213077 | 1.001595515  | 0.04 | 0.366548 | 4.64385619  |
| <b>hsa-miR-509-5p</b>                               | 3.75        | 3.967741935 | 3.585365854 | 0.903628792 | -0.146197855 | 0.87 | 0.961391 | 0.200912694 |
| <b>hsa-miR-20a-5p+hsa-miR-20b-5p</b>                | 291.125     | 165.0645161 | 386.4390244 | 2.341139292 | 1.227210774  | 0.01 | 0.366548 | 6.64385619  |
| <b>hsa-miR-323b-3p</b>                              | 8.958333333 | 7.548387097 | 10.02439024 | 1.328017511 | 0.40927417   | 0.61 | 0.878678 | 0.713118852 |
| <b>hsa-miR-1285-3p</b>                              | 6.222222222 | 4.451612903 | 7.56097561  | 1.698480028 | 0.764244254  | 0.39 | 0.646249 | 1.358453971 |
| <b>hsa-miR-221-3p</b>                               | 154.25      | 93.38709677 | 200.2682927 | 2.144496398 | 1.100638893  | 0.03 | 0.366548 | 5.058893689 |
| <b>hsa-miR-376a-3p</b>                              | 37.65277778 | 25.93548387 | 46.51219512 | 1.793380658 | 0.842681743  | 0.13 | 0.400889 | 2.943416472 |
| <b>hsa-miR-526a+hsa-miR-518c-5p+hsa-miR-518d-5p</b> | 18.43055556 | 11.74193548 | 23.48780488 | 2.000335031 | 1.000241653  | 0.16 | 0.425878 | 2.64385619  |
| <b>hsa-let-7d-5p</b>                                | 390.2777778 | 280.7741935 | 473.0731707 | 1.684888361 | 0.752653003  | 0.12 | 0.378233 | 3.058893689 |
| <b>hsa-miR-196a-5p</b>                              | 20.88888889 | 18.19354839 | 22.92682927 | 1.260162602 | 0.3336099    | 0.6  | 0.877303 | 0.736965594 |
| <b>hsa-miR-1299</b>                                 | 27.52777778 | 17.80645161 | 34.87804878 | 1.958731    | 0.969919281  | 0.11 | 0.370329 | 3.184424571 |
| <b>hsa-miR-506-3p</b>                               | 13.06944444 | 8.870967742 | 16.24390244 | 1.83113082  | 0.872734864  | 0.21 | 0.493144 | 2.251538767 |
| <b>hsa-miR-491-5p</b>                               | 10.20833333 | 6.129032258 | 13.29268293 | 2.168806162 | 1.116901117  | 0.14 | 0.408613 | 2.836501268 |
| <b>hsa-miR-513b-5p</b>                              | 10.63888889 | 5.709677419 | 14.36585366 | 2.516053466 | 1.33116258   | 0.08 | 0.368445 | 3.64385619  |
| <b>hsa-miR-514a-5p</b>                              | 9.625       | 6.129032258 | 12.26829268 | 2.001668806 | 1.001203287  | 0.19 | 0.467373 | 2.395928676 |
| <b>hsa-miR-1183</b>                                 | 20.26388889 | 10.25806452 | 27.82926829 | 2.712916091 | 1.439844427  | 0.04 | 0.366548 | 4.64385619  |
| <b>hsa-miR-1910-5p</b>                              | 27.75       | 17.19354839 | 35.73170732 | 2.078204366 | 1.055337532  | 0.08 | 0.368445 | 3.64385619  |
| <b>hsa-miR-451a</b>                                 | 73635.125   | 44574.29032 | 95607.95122 | 2.144912471 | 1.100918776  | 0.04 | 0.366548 | 4.64385619  |
| <b>hsa-miR-144-3p</b>                               | 206.3611111 | 144.6129032 | 253.0487805 | 1.749835422 | 0.807219238  | 0.1  | 0.370329 | 3.321928095 |
| <b>hsa-miR-4421</b>                                 | 5.069444444 | 2.161290323 | 7.268292683 | 3.362941391 | 1.749723636  | 0.08 | 0.368445 | 3.64385619  |
| <b>hsa-miR-532-5p</b>                               | 8.083333333 | 4.193548387 | 11.02439024 | 2.628893058 | 1.394455455  | 0.09 | 0.370329 | 3.473931188 |
| <b>hsa-miR-320e</b>                                 | 1701.333333 | 986.4193548 | 2241.878049 | 2.27274337  | 1.184434789  | 0.01 | 0.366548 | 6.64385619  |
| <b>hsa-miR-29c-3p</b>                               | 23.48611111 | 13.4516129  | 31.07317073 | 2.309995906 | 1.207890295  | 0.05 | 0.366548 | 4.321928095 |
| <b>hsa-miR-145-5p</b>                               | 9.805555556 | 6.193548387 | 12.53658537 | 2.024136179 | 1.017306354  | 0.18 | 0.454091 | 2.473931188 |
| <b>hsa-miR-342-3p</b>                               | 179.5833333 | 125.3548387 | 220.5853659 | 1.759687684 | 0.815319397  | 0.1  | 0.370329 | 3.321928095 |

|                                 |             |             |             |             |             |      |          |             |
|---------------------------------|-------------|-------------|-------------|-------------|-------------|------|----------|-------------|
| hsa-miR-425-5p                  | 59.81944444 | 34.19354839 | 79.19512195 | 2.316083755 | 1.211687426 | 0.02 | 0.366548 | 5.64385619  |
| hsa-miR-612                     | 103.5555556 | 86.09677419 | 116.7560976 | 1.356103044 | 0.439466806 | 0.38 | 0.643574 | 1.395928676 |
| hsa-miR-1306-5p                 | 2.583333333 | 1.064516129 | 3.731707317 | 3.505543237 | 1.809638029 | 0.18 | 0.446603 | 2.473931188 |
| hsa-miR-23b-3p                  | 27.73611111 | 19          | 34.34146341 | 1.807445443 | 0.853952101 | 0.15 | 0.414946 | 2.736965594 |
| hsa-miR-28-3p                   | 6.763888889 | 4.870967742 | 8.195121951 | 1.682442255 | 0.750556989 | 0.39 | 0.644904 | 1.358453971 |
| hsa-miR-585-3p                  | 13.90277778 | 12.58064516 | 14.90243902 | 1.184552846 | 0.244342562 | 0.73 | 0.919104 | 0.454031631 |
| hsa-miR-185-5p                  | 205.3888889 | 117.1935484 | 272.0731707 | 2.321571234 | 1.215101548 | 0.02 | 0.366548 | 5.64385619  |
| hsa-miR-497-5p                  | 5.013888889 | 2.419354839 | 6.975609756 | 2.883252033 | 1.527696952 | 0.12 | 0.382728 | 3.058893689 |
| hsa-miR-548a-5p                 | 4.847222222 | 3.193548387 | 6.097560976 | 1.909337275 | 0.93307197  | 0.35 | 0.601768 | 1.514573173 |
| hsa-miR-582-5p                  | 7.236111111 | 6.322580645 | 7.926829268 | 1.253733201 | 0.32623037  | 0.71 | 0.919104 | 0.49410907  |
| hsa-miR-626                     | 8.486111111 | 6.580645161 | 9.926829268 | 1.508488761 | 0.593103948 | 0.46 | 0.737438 | 1.120294234 |
| hsa-miR-132-3p                  | 10.56944444 | 7.903225806 | 12.58536585 | 1.592434047 | 0.671233622 | 0.37 | 0.629888 | 1.434402824 |
| hsa-miR-18a-5p                  | 32.08333333 | 17.22580645 | 43.31707317 | 2.514661551 | 1.33036424  | 0.02 | 0.366548 | 5.64385619  |
| hsa-miR-126-3p                  | 1355.361111 | 962.3225806 | 1652.536585 | 1.717237669 | 0.780089725 | 0.1  | 0.370329 | 3.321928095 |
| hsa-miR-548g-3p                 | 8.597222222 | 8.451612903 | 8.707317073 | 1.030255074 | 0.043001568 | 0.98 | 0.996877 | 0.029146346 |
| hsa-miR-598-3p                  | 33.19444444 | 27.03225806 | 37.85365854 | 1.400314337 | 0.485750714 | 0.57 | 0.852536 | 0.810966176 |
| hsa-miR-574-3p                  | 5.888888889 | 5.032258065 | 6.536585366 | 1.298936836 | 0.377331277 | 0.69 | 0.919104 | 0.535331733 |
| hsa-miR-642a-5p                 | 3.277777778 | 3.387096774 | 3.195121951 | 0.943321719 | -0.08417821 | 0.92 | 0.980533 | 0.120294234 |
| hsa-miR-301a-3p                 | 9.25        | 6.129032258 | 11.6097561  | 1.894223363 | 0.921606461 | 0.24 | 0.515541 | 2.058893689 |
| hsa-miR-26b-5p                  | 287.3333333 | 168.1612903 | 377.4390244 | 2.244505996 | 1.16639795  | 0.05 | 0.366548 | 4.321928095 |
| hsa-miR-378i                    | 37.54166667 | 26.70967742 | 45.73170732 | 1.712177448 | 0.775832229 | 0.17 | 0.425878 | 2.556393349 |
| hsa-miR-4286                    | 140.5277778 | 124.8709677 | 152.3658537 | 1.220186376 | 0.287101528 | 0.57 | 0.851726 | 0.810966176 |
| hsa-miR-4516                    | 65.25       | 33.64516129 | 89.14634146 | 2.649603629 | 1.405776554 | 0.11 | 0.377989 | 3.184424571 |
| hsa-miR-421                     | 8.902777778 | 5.935483871 | 11.14634146 | 1.877916225 | 0.909132705 | 0.25 | 0.515541 | 2           |
| hsa-miR-543                     | 9.097222222 | 7.64516129  | 10.19512195 | 1.333539158 | 0.415260189 | 0.6  | 0.877303 | 0.736965594 |
| hsa-miR-324-3p                  | 5.291666667 | 3.64516129  | 6.536585366 | 1.793222534 | 0.842554534 | 0.38 | 0.639909 | 1.395928676 |
| hsa-miR-365a-3p+hsa-miR-365b-3p | 6.138888889 | 5           | 7           | 1.4         | 0.485426827 | 0.6  | 0.877303 | 0.736965594 |
| hsa-miR-1285-5p                 | 17.875      | 12.80645161 | 21.70731707 | 1.695029797 | 0.761310634 | 0.24 | 0.515541 | 2.058893689 |
| hsa-miR-183-5p                  | 6.722222222 | 5.903225806 | 7.341463415 | 1.243635879 | 0.314564144 | 0.73 | 0.919104 | 0.454031631 |
| hsa-miR-10a-5p                  | 10.15277778 | 6.935483871 | 12.58536585 | 1.814634146 | 0.859678712 | 0.25 | 0.515541 | 2           |
| hsa-miR-1290                    | 36.90277778 | 22.77419355 | 47.58536585 | 2.08944241  | 1.063117995 | 0.06 | 0.366548 | 4.058893689 |
| hsa-miR-107                     | 111.875     | 70.38709677 | 143.2439024 | 2.035087523 | 1.025090842 | 0.04 | 0.366548 | 4.64385619  |

|                                 |             |             |             |             |             |      |          |             |
|---------------------------------|-------------|-------------|-------------|-------------|-------------|------|----------|-------------|
| hsa-miR-34a-5p                  | 13.73611111 | 9.967741935 | 16.58536585 | 1.663904018 | 0.734572214 | 0.29 | 0.554246 | 1.785875195 |
| hsa-miR-301a-5p                 | 8.569444444 | 4.451612903 | 11.68292683 | 2.624425592 | 1.392001695 | 0.14 | 0.408613 | 2.836501268 |
| hsa-miR-199b-5p                 | 6.916666667 | 4.516129032 | 8.731707317 | 1.933449477 | 0.951177066 | 0.27 | 0.528701 | 1.888968688 |
| hsa-let-7g-5p                   | 441.125     | 312.6129032 | 538.2926829 | 1.721914474 | 0.784013487 | 0.1  | 0.370329 | 3.321928095 |
| hsa-miR-26a-5p                  | 219.7222222 | 155.9677419 | 267.9268293 | 1.717834893 | 0.780591381 | 0.11 | 0.370329 | 3.184424571 |
| hsa-miR-888-5p                  | 7.722222222 | 7.193548387 | 8.12195122  | 1.129060483 | 0.175122773 | 0.85 | 0.961391 | 0.234465254 |
| hsa-miR-186-5p                  | 18.66666667 | 11.19354839 | 24.31707317 | 2.172418641 | 1.119302148 | 0.08 | 0.368445 | 3.64385619  |
| hsa-miR-10b-5p                  | 10.875      | 6.870967742 | 13.90243902 | 2.02335967  | 1.016752795 | 0.17 | 0.429534 | 2.556393349 |
| hsa-miR-197-5p                  | 8.152777778 | 6.580645161 | 9.341463415 | 1.419536107 | 0.505419546 | 0.54 | 0.824472 | 0.888968688 |
| hsa-miR-301b-3p                 | 4.722222222 | 4.677419355 | 4.756097561 | 1.016820858 | 0.02406553  | 1    | 1        | 0           |
| hsa-miR-1255a                   | 8.805555556 | 5.870967742 | 11.02439024 | 1.877780756 | 0.909028628 | 0.25 | 0.515541 | 2           |
| hsa-miR-1295a                   | 13.25       | 12.41935484 | 13.87804878 | 1.117453278 | 0.160214512 | 0.83 | 0.956438 | 0.268816758 |
| hsa-miR-23a-3p                  | 2072.944444 | 1557        | 2463.04878  | 1.581919576 | 0.661676256 | 0.16 | 0.425878 | 2.64385619  |
| hsa-miR-30e-5p                  | 91.90277778 | 56.29032258 | 118.8292683 | 2.111007058 | 1.077931403 | 0.04 | 0.366548 | 4.64385619  |
| hsa-miR-335-5p                  | 7.861111111 | 5.129032258 | 9.926829268 | 1.935419543 | 0.952646335 | 0.25 | 0.515541 | 2           |
| hsa-miR-514b-5p                 | 20.18055556 | 13.93548387 | 24.90243902 | 1.786980578 | 0.837523954 | 0.27 | 0.528701 | 1.888968688 |
| hsa-miR-199a-3p+hsa-miR-199b-3p | 834.2638889 | 597.8064516 | 1013.04878  | 1.694609982 | 0.760953273 | 0.11 | 0.370329 | 3.184424571 |
| hsa-miR-1537-3p                 | 11.33333333 | 6.870967742 | 14.70731707 | 2.140501546 | 1.097948877 | 0.17 | 0.425878 | 2.556393349 |
| hsa-miR-3168                    | 5.208333333 | 3.709677419 | 6.341463415 | 1.709437964 | 0.773522068 | 0.42 | 0.682324 | 1.251538767 |
| hsa-miR-664a-3p                 | 8.611111111 | 5.35483871  | 11.07317073 | 2.067881281 | 1.048153362 | 0.19 | 0.463572 | 2.395928676 |
| hsa-miR-337-3p                  | 18.01388889 | 13.58064516 | 21.36585366 | 1.573257633 | 0.653754942 | 0.34 | 0.601768 | 1.556393349 |
| hsa-miR-363-3p                  | 38.70833333 | 28.22580645 | 46.63414634 | 1.652181185 | 0.724371907 | 0.21 | 0.490084 | 2.251538767 |
| hsa-miR-199a-5p                 | 49.19444444 | 33.29032258 | 61.2195122  | 1.838958215 | 0.878888699 | 0.1  | 0.370329 | 3.321928095 |
| hsa-miR-16-5p                   | 7170.819444 | 4387.870968 | 9275        | 2.113781392 | 1.07982618  | 0.04 | 0.366548 | 4.64385619  |
| hsa-miR-299-3p                  | 4.805555556 | 3.322580645 | 5.926829268 | 1.783802984 | 0.834956282 | 0.4  | 0.654271 | 1.321928095 |
| hsa-miR-454-3p                  | 14.20833333 | 9.677419355 | 17.63414634 | 1.822195122 | 0.865677452 | 0.21 | 0.487612 | 2.251538767 |
| hsa-miR-660-5p                  | 30.63888889 | 17.67741935 | 40.43902439 | 2.287609044 | 1.193840514 | 0.08 | 0.368445 | 3.64385619  |
| hsa-miR-27b-3p                  | 34.83333333 | 21.96774194 | 44.56097561 | 2.028473192 | 1.020394236 | 0.07 | 0.368445 | 3.836501268 |
| hsa-miR-106b-5p                 | 25.36111111 | 14.29032258 | 33.73170732 | 2.360458074 | 1.239066858 | 0.04 | 0.366548 | 4.64385619  |
| hsa-miR-625-5p                  | 4.986111111 | 4           | 5.731707317 | 1.432926829 | 0.518964942 | 0.6  | 0.877303 | 0.736965594 |
| hsa-miR-130a-3p                 | 293.1527778 | 178.9677419 | 379.4878049 | 2.12042573  | 1.084353952 | 0.03 | 0.366548 | 5.058893689 |
| hsa-miR-15b-5p                  | 530.9305556 | 371.9677419 | 651.1219512 | 1.750479619 | 0.807750265 | 0.09 | 0.370329 | 3.473931188 |

|                               |             |             |             |             |              |      |          |             |
|-------------------------------|-------------|-------------|-------------|-------------|--------------|------|----------|-------------|
| hsa-miR-222-3p                | 136.2083333 | 92.09677419 | 169.5609756 | 1.841117423 | 0.880581642  | 0.08 | 0.368445 | 3.64385619  |
| hsa-miR-25-3p                 | 2834.944444 | 1968.451613 | 3490.097561 | 1.773016689 | 0.826206116  | 0.08 | 0.368445 | 3.64385619  |
| hsa-miR-769-5p                | 9.125       | 9.548387097 | 8.804878049 | 0.922132498 | -0.116954033 | 0.86 | 0.961391 | 0.217591435 |
| hsa-miR-146a-5p               | 289.4583333 | 194.1612903 | 361.5121951 | 1.861916938 | 0.896788714  | 0.07 | 0.368445 | 3.836501268 |
| hsa-let-7e-5p                 | 23.80555556 | 18.51612903 | 27.80487805 | 1.501657177 | 0.586555488  | 0.33 | 0.597094 | 1.59946207  |
| hsa-miR-361-3p                | 7.472222222 | 5.290322581 | 9.12195122  | 1.724271267 | 0.785986761  | 0.35 | 0.601768 | 1.514573173 |
| hsa-miR-1322                  | 8.888888889 | 7.161290323 | 10.19512195 | 1.423643155 | 0.509587571  | 0.52 | 0.805131 | 0.943416472 |
| hsa-miR-22-3p                 | 276.9166667 | 175.2258065 | 353.804878  | 2.019136822 | 1.013738675  | 0.04 | 0.366548 | 4.64385619  |
| hsa-miR-106a-5p+hsa-miR-17-5p | 146.9722222 | 79.64516129 | 197.8780488 | 2.48449555  | 1.312952958  | 0.01 | 0.366548 | 6.64385619  |
| hsa-miR-181a-5p               | 118.0972222 | 85.51612903 | 142.7317073 | 1.669061836 | 0.739037405  | 0.14 | 0.408613 | 2.836501268 |
| hsa-miR-148b-3p               | 74.34722222 | 47.80645161 | 94.41463415 | 1.974934992 | 0.981805166  | 0.06 | 0.366548 | 4.058893689 |
| hsa-miR-223-3p                | 7873.986111 | 5219.451613 | 9881.073171 | 1.893124777 | 0.920769503  | 0.05 | 0.366548 | 4.321928095 |
| hsa-miR-652-3p                | 13.11111111 | 6.612903226 | 18.02439024 | 2.7256395   | 1.44659476   | 0.04 | 0.366548 | 4.64385619  |
| hsa-miR-630                   | 23.04166667 | 11.67741935 | 31.63414634 | 2.709001482 | 1.437761183  | 0.12 | 0.382728 | 3.058893689 |
| hsa-miR-197-3p                | 6.458333333 | 6.258064516 | 6.609756098 | 1.056198139 | 0.078880505  | 0.95 | 0.996399 | 0.074000581 |
| hsa-miR-495-3p                | 16.5        | 14.51612903 | 18          | 1.24        | 0.310340121  | 0.64 | 0.901814 | 0.64385619  |
| hsa-miR-432-5p                | 7.736111111 | 7.129032258 | 8.195121951 | 1.149541993 | 0.201059169  | 0.82 | 0.956438 | 0.286304185 |
| hsa-miR-486-3p                | 61.22222222 | 42.4516129  | 75.41463415 | 1.776484543 | 0.829025136  | 0.12 | 0.378233 | 3.058893689 |
| hsa-miR-4455                  | 5.152777778 | 2.225806452 | 7.365853659 | 3.309296571 | 1.726524588  | 0.11 | 0.370329 | 3.184424571 |
| hsa-let-7f-5p                 | 80.08333333 | 61.87096774 | 93.85365854 | 1.516925659 | 0.601150385  | 0.24 | 0.515541 | 2.058893689 |
| hsa-miR-7-5p                  | 58.11111111 | 35.32258065 | 75.34146341 | 2.132954672 | 1.092853307  | 0.04 | 0.366548 | 4.64385619  |
| hsa-miR-361-5p                | 40.97222222 | 31.06451613 | 48.46341463 | 1.560089152 | 0.641628475  | 0.25 | 0.515541 | 2           |
| hsa-miR-30d-5p                | 252.9861111 | 165.0645161 | 319.4634146 | 1.935385158 | 0.952620703  | 0.05 | 0.366548 | 4.321928095 |
| hsa-miR-99b-5p                | 16.875      | 14.29032258 | 18.82926829 | 1.317623741 | 0.397938454  | 0.55 | 0.831773 | 0.862496476 |
| hsa-miR-206                   | 8.597222222 | 8.35483871  | 8.780487805 | 1.050946417 | 0.071689114  | 0.95 | 0.996399 | 0.074000581 |
| hsa-miR-125a-5p               | 36.36111111 | 27.19354839 | 43.29268293 | 1.592020369 | 0.670858794  | 0.23 | 0.515541 | 2.120294234 |
| hsa-miR-629-5p                | 5.361111111 | 3.516129032 | 6.756097561 | 1.921458939 | 0.942202147  | 0.32 | 0.591941 | 1.64385619  |
| hsa-miR-3065-5p               | 94.26388889 | 68.06451613 | 114.0731707 | 1.675956537 | 0.744984736  | 0.24 | 0.515541 | 2.058893689 |
| hsa-miR-30a-5p                | 21.75       | 14.51612903 | 27.2195122  | 1.875121951 | 0.906984426  | 0.14 | 0.408613 | 2.836501268 |
